# Supplementary material for: Stabilisation of solid-state cubic ammonia confined in a glass substance at ambient temperature under atmospheric pressure
Source: Royal Society of Chemistry journal article supplement (doi:10.1039/d4ra00229f), 2024-01-01
Supplement: d4ra00229f1.pdf [file d4ra00229f1.pdf]

Supplementary material

Table S1 The standard Gibbs energies of formation ( $\Delta_f G_m^\circ$ ) for BN(cr)<sup>27</sup>, CrN(cr)<sup>27</sup>, and TiN(cr)<sup>27</sup> related to the B–N bond along the phase boundary between NH<sub>3</sub>(cr) and the B<sub>2</sub>O<sub>3</sub>(gl)–B(OH)<sub>3</sub>(gl) glass matrix (GM).

| Substance                | $\Delta_f G_m^\circ / (\text{kJ (mol of compd.)}^{-1})$ |
|--------------------------|---------------------------------------------------------|
| BN(cr) <sup>27, *1</sup> | -228.501                                                |
| CrN(cr) <sup>27</sup>    | -92.703                                                 |
| TiN(cr) <sup>27</sup>    | -309.155                                                |

\*<sup>1</sup>Hexagonal

The  $C_{p,m}^\circ$  values for the solid state cubic NH<sub>3</sub>(cr) were evaluated by the recently developed formulas:<sup>32-34, 46,47</sup> a semi-empirical power law function composed of the electronic and lattice vibration terms at  $0 < T < 5-6$  K; an empirical power law temperature function at  $5-6 < T < 40 - 50$  K; the Debye-Einstein (DE) at  $40 - 50 < T < 300$  K, expressed as

$$C_{p,m}^\circ = \gamma T + \sum_{j=3,5,7,9} A_j T^j \quad 0 < T < 5 - 6 \text{ K} \quad (\text{S1})$$

$$C_{p,m}^\circ = \sum_{j=0}^6 B_j T^j \quad 5 - 6 \text{ K} < T < 40 - 50 \text{ K} \quad (\text{S2})$$

$$C_{p,m}^\circ = 3R \left\{ mD\left(\frac{\Theta_D}{T}\right) + nE\left(\frac{\Theta_{E1}}{T}\right) + lE\left(\frac{\Theta_{E2}}{T}\right) \right\} \quad 40 - 50 \text{ K} < T < 300 \text{ K} \quad (\text{S3})$$

where, for NH<sub>3</sub>(cr), the fitting functions were divided in three temperature ranges: at 0.5 – 5.20 K; 5.20 – 41.36 K; 41.36 – 300 K, as shown in Tables S1-S3. At 0 – 5.20 K (eq.(S1)),  $\gamma$  is the coefficient of the electronic term contributing to  $C_{p,m}^\circ$ .<sup>31-36</sup> For insulating substances, it results from vacancies<sup>32</sup>  $A_i$  are the coefficients for the lattice vibration term contributing to  $C_{p,m}^\circ$ .<sup>29-34</sup> At 5.20 – 41.36 K (eq.(S2)),  $B_i$  are the adjustable coefficients for providing sufficient overlap to the measured  $C_{p,m}^\circ$  data and for connecting smoothly near the inflection points around 5.02 K and

41.36 K. At 41.36 – 300 K (eq.(S3)),  $\left(\frac{\Theta_D}{T}\right)$ ,  $\left(\frac{\Theta_{E_1}}{T}\right)$  and  $\left(\frac{\Theta_{E_2}}{T}\right)$  are Debye and Einstein functions;

$\Theta_D$ ,  $\Theta_{E_1}$  and  $\Theta_{E_2}$  are the Debye and Einstein temperatures used for adjustable parameter;  $m$ ,  $n$  and  $l$  are the adjustable parameters and the sum of  $m$ ,  $n$  and  $l$  should be approximately closed to the number of atoms in the formula unit.<sup>33-36</sup> Tables S1-S3 shows the adjustable parameters. Six digits numbers for  $\Theta_D$ ,  $\Theta_{E_1}$ ,  $\Theta_{E_2}$ ,  $m$ ,  $n$  and  $l$  are necessary to reproduce the experimental  $C_{p,m}^\circ$  data as five digits numbers.

The  $C_{p,m}^\circ$  data at 298.15 K of metal elements are about 25 (J K<sup>-1</sup> (mol of atoms)<sup>-1</sup>) following the Dulong-Petit law, and the Debye and Einstein functions are the theories<sup>(29)</sup> to satisfy the Dulong-Petit law. However, the compounds composed of non-metallic element do not follow the Dulong-Petit law, and their  $C_{p,m}^\circ$  data are empirically half values, e.g. the  $C_{p,m}^\circ$  data at 298.15 K of B<sub>2</sub>O<sub>3</sub>(cr) and B(OH)<sub>3</sub> are 62.761 (J K<sup>-1</sup> (mol of compd.)<sup>-1</sup>), i.e. , 12.552 (J K<sup>-1</sup> (mol of atoms)<sup>-1</sup>), and 86.060 (J K<sup>-1</sup> (mol of compd.)<sup>-1</sup>), i.e. , 12.294 (J K<sup>-1</sup> (mol of atoms)<sup>-1</sup>), respectively. Therefore, the  $C_{p,m}^\circ$  data for NH<sub>3</sub>(cr) were adopted as the half values calculated from the parameters summarized in Table S2.

Table S2 Parameters for the fitting functions used to fits the  $C_{p,m}^\circ$  data for the solid state cubic NH<sub>3</sub>(cr) from Eqs.S1-S3. The notation E  $\pm kl$  indicates the power of 10.

| Temp. range: 0.5 – 5.20 K                                    | Coefficient  |
|--------------------------------------------------------------|--------------|
| $\gamma$ (J K <sup>-2</sup> (mol of compd.) <sup>-1</sup> )  | 8.07997E-08  |
| $A_3$ (J K <sup>-4</sup> (mol of compd.) <sup>-1</sup> )     | 1.98334E-03  |
| $A_5$ (J K <sup>-6</sup> (mol of compd.) <sup>-1</sup> )     | 2.67852E-08  |
| $A_7$ (J K <sup>-8</sup> (mol of compd.) <sup>-1</sup> )     | -3.48652E-09 |
| $A_9$ (J K <sup>-10</sup> (mol of compd.) <sup>-1</sup> )    | 1.93042E-10  |
| $A_{11}$ (J K <sup>-12</sup> (mol of compd.) <sup>-1</sup> ) | -3.81599E-12 |
| Temp. range: 5.20 – 44.29 K                                  | Coefficient  |
| $B_0$ (J K <sup>-1</sup> (mol of comd.) <sup>-1</sup> )      | -2.49757E-01 |
| $B_1$ (J K <sup>-2</sup> (mol of comd.) <sup>-1</sup> )      | 2.18229E-01  |
| $B_2$ (J K <sup>-3</sup> (mol of comd.) <sup>-1</sup> )      | -6.30746E-02 |

|                                                    |              |
|----------------------------------------------------|--------------|
| $B_3/(\text{J K}^{-4} (\text{mol of comd.})^{-1})$ | 9.77004E-03  |
| $B_4/(\text{J K}^{-5} (\text{mol of comd.})^{-1})$ | -4.12224E-04 |
| $B_5/(\text{J K}^{-6} (\text{mol of comd.})^{-1})$ | 7.37473E-06  |
| $B_6/(\text{J K}^{-7} (\text{mol of comd.})^{-1})$ | -4.92858E-08 |
| <hr/>                                              |              |
| Temp. range: 44.29 – 300 K                         | Coefficient  |
| $\Theta_D/\text{K}$                                | 1.10961.E+02 |
| $m$                                                | 6.20324E-01  |
| $\Theta_{E1}/\text{K}$                             | 5.32855E+03  |
| $n$                                                | 1.37968E+00  |
| $\Theta_{E2}/\text{K}$                             | 1.31707E+02  |
| $l$                                                | 2.00000E+00  |
| <hr/>                                              |              |
